# Supplementary figures and images for: Human Papillomavirus E6 Triggers Upregulation of the Antiviral and Cancer Genomic DNA Deaminase APOBEC3B
Source: PubMed Central journal article supplement — mBio. 2014 Dec 23;5(6):e02234-14. doi: 10.1128/mBio.02234-14 (PMC4278539; doi:10.1128/mbio.02234-14), 2014-12-23

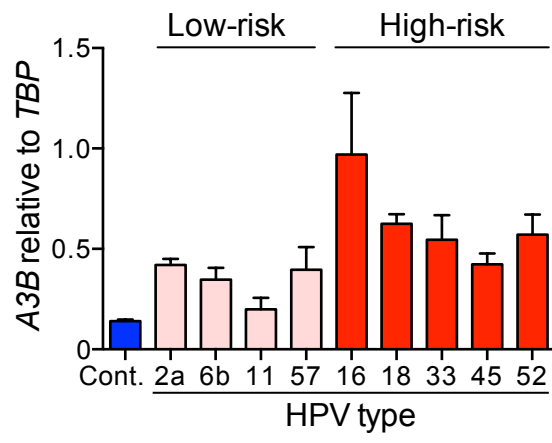

Supplement: mbo006142099sf1.pdf [file mbo006142099sf1.pdf]
